# Supplementary material
Source: MDPI journal article supplement (https://www.mdpi.com/2306-5338/9/10/167)
Supplement: s1 [file s1]

## Supplementary Material

### Application of Hydrological and Sediment Modeling with Limited Data in the Abay (Upper Blue Nile) Basin, Ethiopia

Banteamlak K. Abebe, Fasikaw Atanaw Zimale, Kidie K. Gelaye, Temesgen Gashaw,  
Endalkachew G. Dagnaw, Anwar A. Adem

**Table S1.** Suspended sediment concentration (SSC) data was used for the discharge-sediment rating curve development.

| Sample Number | Date of Sampling | Time Taken, Sec | Flow, m <sup>3</sup> s <sup>-1</sup> | SSC, mg L <sup>-1</sup> |
|---------------|------------------|-----------------|--------------------------------------|-------------------------|
| 1             | 1-Aug-90         | 24              | 37.53                                | 8717.81                 |
| 2             | 1-Aug-90         | 25              | 37.53                                | 4423.12                 |
| 3             | 1-Aug-90         | 30              | 37.53                                | 4024.37                 |
| 1             | 30-Apr-93        | 55              | 1.42                                 | 368.21                  |
| 2             | 30-Apr-93        | 52              | 1.42                                 | 347.07                  |
| 3             | 30-Apr-93        | 49              | 1.42                                 | 380.55                  |
| 1             | 23-Feb-05        | 40              | 1.33                                 | 257.06                  |
| 2             | 23-Feb-05        | 34              | 1.33                                 | 254.00                  |
| 3             | 23-Feb-05        | 35              | 1.33                                 | 252.81                  |
| 1             | 6-Jun-05         | 50              | 0.93                                 | 207.75                  |
| 2             | 6-Jun-05         | 75              | 0.93                                 | 234.55                  |
| 3             | 6-Jun-05         | 42              | 0.93                                 | 187.71                  |
| 1             | 12-Aug-07        | 11              | 40.96                                | 11437.10                |
| 2             | 12-Aug-07        | 10              | 40.96                                | 6447.20                 |
| 3             | 12-Aug-07        | 9               | 40.96                                | 6708.80                 |
| 1             | 13-Aug-07        | 15              | 15.32                                | 1279.40                 |
| 2             | 13-Aug-07        | 12              | 15.32                                | 1277.78                 |
| 3             | 13-Aug-07        | 10              | 15.32                                | 1164.18                 |
| 1             | 12-Dec-07        | 17              | 3.64                                 | 264.53                  |
| 2             | 12-Dec-07        | 16              | 3.64                                 | 277.78                  |
| 3             | 12-Dec-07        | 24              | 3.64                                 | 276.32                  |
| 1             | 9-Aug-10         | 25              | 63.15                                | 7464.05                 |
| 2             | 9-Aug-10         | 17              | 63.15                                | 8834.47                 |
| 3             | 9-Aug-10         | 18              | 63.15                                | 6962.75                 |
| 1             | 3-Oct-11         | 75              | 13.43                                | 1876.80                 |

| Sample Number | Date of Sampling | Time Taken, Sec | Flow, m <sup>3</sup> s <sup>-1</sup> | SSC, mg L <sup>-1</sup> |
|---------------|------------------|-----------------|--------------------------------------|-------------------------|
| 2             | 3-Oct-11         | 57              | 13.43                                | 1759.00                 |
| 3             | 3-Oct-11         | 46              | 13.43                                | 1877.63                 |
| 1             | 4-Oct-11         | 30              | 7.91                                 | 1241.62                 |
| 2             | 4-Oct-11         | 25              | 7.91                                 | 1338.16                 |
| 3             | 4-Oct-11         | 55              | 7.91                                 | 1338.25                 |
| 1             | 5-Oct-11         | 36              | 8.51                                 | 595.67                  |
| 2             | 5-Oct-11         | 26              | 8.51                                 | 543.06                  |
| 3             | 5-Oct-11         | 27              | 8.51                                 | 508.21                  |
| 1             | 6-Oct-11         | 42              | 7.74                                 | 358.81                  |
| 2             | 6-Oct-11         | 38              | 7.74                                 | 377.92                  |
| 3             | 6-Oct-11         | 34              | 7.74                                 | 357.35                  |
| 1             | 11-May-14        | 25              | 2.93                                 | 7682.25                 |
| 2             | 11-May-14        | 22              | 2.93                                 | 7933.68                 |
| 3             | 11-May-14        | 23              | 2.93                                 | 6581.20                 |
| 1             | 16-Jun-14        | 13              | 3.53                                 | 689.88                  |
| 2             | 16-Jun-14        | 15              | 3.53                                 | 680.71                  |
| 3             | 16-Jun-14        | 15              | 3.53                                 | 709.50                  |

**Table S2.** Initial streamflow parameters and their range that was used for sensitivity analysis. In the parameters list, r\_ stands for the operation of the existing parameter value multiplied by (1+ given value); v\_ is for the operation of the existing parameter value to be replaced by a given value, and a\_ is for the operations of a given value added to the existing parameter value.

| No | Parameters and Operation | Initial Range Values |         |
|----|--------------------------|----------------------|---------|
|    |                          | Minimum              | Maximum |
| 1  | v_ALPHA_BF.gw            | 0                    | 1       |
| 2  | v_BIOMIX.mgt             | 0                    | 1       |
| 3  | a_CANMX.hru              | 0                    | 10      |
| 4  | v_CH_K2.rte              | 0                    | 15      |
| 5  | v_CH_N2.rte              | 0                    | 1       |
| 6  | r_CN2.mgt                | -0.2                 | 0.2     |
| 7  | a_EPCO.hru               | 0                    | 1       |
| 8  | v_ESCO.hru               | 0                    | 1       |
| 9  | a_GW_DELAY.gw            | -30                  | 60      |

| No | Parameters and Operation | Initial Range Values |         |
|----|--------------------------|----------------------|---------|
|    |                          | Minimum              | Maximum |
| 10 | v_GW_REVAP.gw            | -0.036               | 0.2     |
| 11 | a_GWQMN.gw               | -1000                | 1000    |
| 12 | a_REVAPMN.gw             | -750                 | 750     |
| 13 | r_SOL_ALB( ).sol         | -0.25                | 0.25    |
| 14 | r_SOL_AWC( ).sol         | -0.2                 | 0.2     |
| 15 | r_SOL_K( ).sol           | -0.2                 | 0.2     |
| 16 | r_SOL_Z( ).sol           | -0.2                 | 0.2     |
| 17 | v_SURLAG.bsn             | 0                    | 10      |
| 18 | v_TLAPS.sub              | 0                    | 50      |
| 19 | v_CH_COV( ).rte          | 0                    | 1       |
| 20 | v_CH_EROD( ).rte         | 0                    | 1       |
| 21 | v_ALPHA_BF_D.gw          | 0                    | 1       |
| 22 | v_ALPHA_BNK.rte          | 0                    | 1       |
| 23 | v_RCHRG_DP.gw            | 0                    | 1       |
